# Supplementary material for: Beta cell regeneration after single-round immunological destruction in a mouse model
Source: PubMed Central journal article supplement (PMC4287683; doi:10.1007/s00125-014-3416-4), 2014-10-23
Supplement: 125_2014_3416_MOESM1_ESM.pdf [file 125_2014_3416_MOESM1_ESM.pdf]

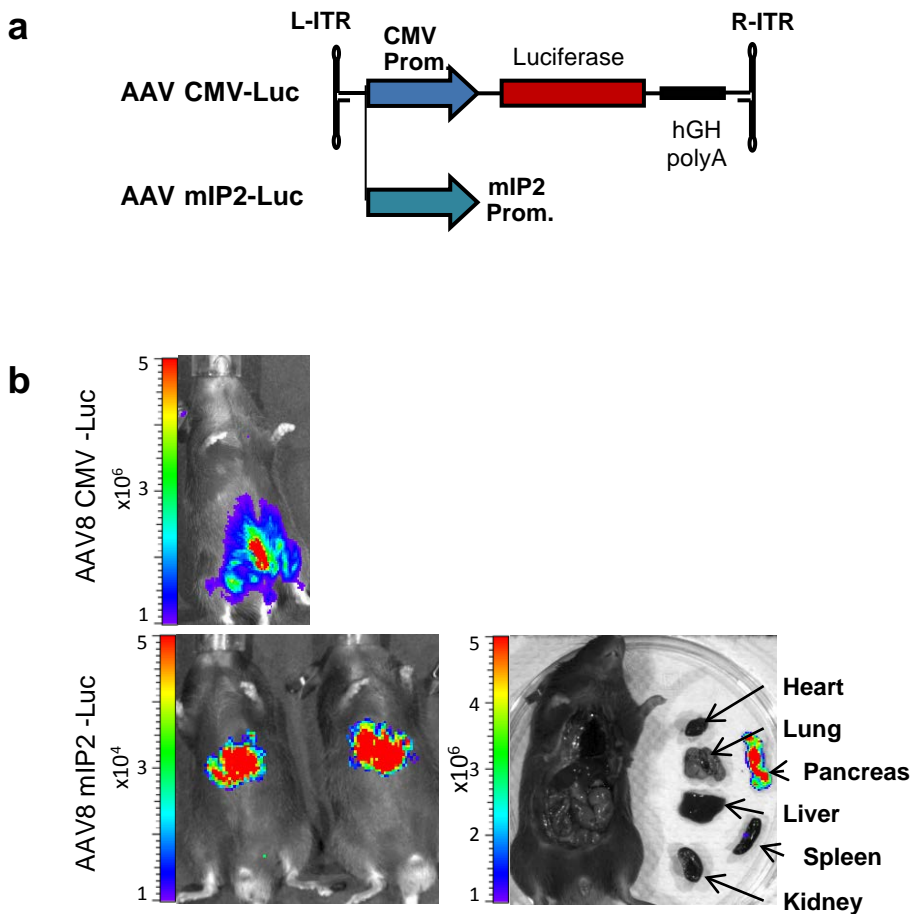

**ESM Fig 1. Systemic administration of AAV8 vectors with murine insulin promoters restricts transgene expression to pancreas.**

**a.** Schematic representation of AAV vectors with Cytomegalovirus (CMV) promoter & mouse insulin 2 gene (mIP2) promoter constructs with firefly luciferase transgenes. **b.** At 14 days after vector administration through IP, *in vivo* AAV8 mIP2-mediated luciferase expression was monitored by the IVIS live-imaging system. CMV-driven luciferase luminescence was found throughout the intraperitoneal cavity, whereas both insulin promoters restricted expression to the pancreas.
