# Supplementary material for: Beta cell regeneration after single-round immunological destruction in a mouse model
Source: PubMed Central journal article supplement (PMC4287683; doi:10.1007/s00125-014-3416-4), 2014-10-23
Supplement: 125_2014_3416_MOESM3_ESM.pdf [file 125_2014_3416_MOESM3_ESM.pdf]

# ESM Fig. 3

## a. Blood glucose levels in mice treated with AAV8-mIP2-Ova

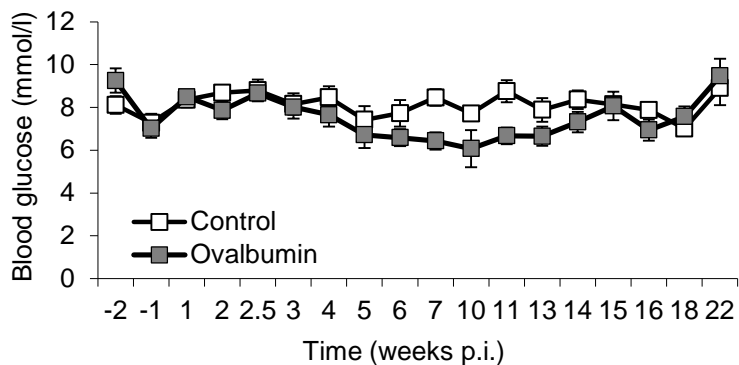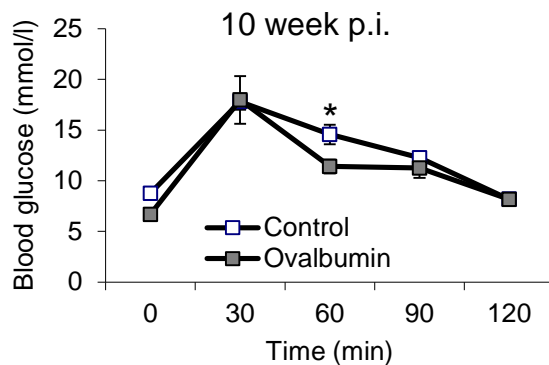

## b. Body weights of AAV8 mIP2-Luc-treated and control mice

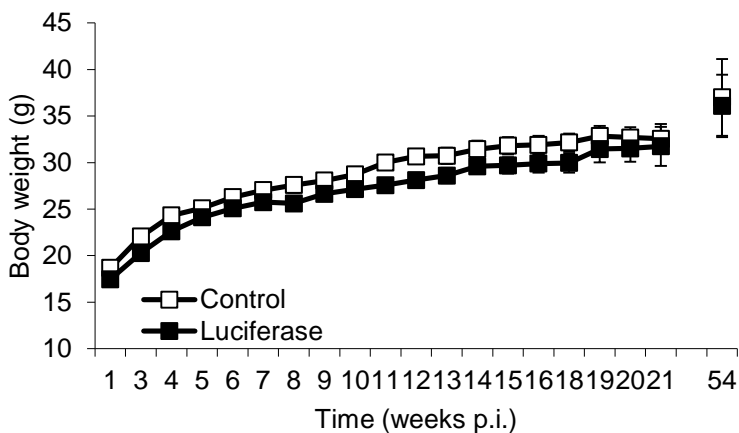

## d.

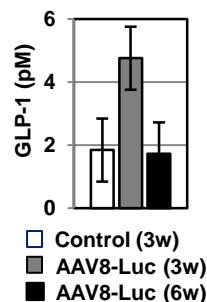

## c. Glucose challenge at different time points.

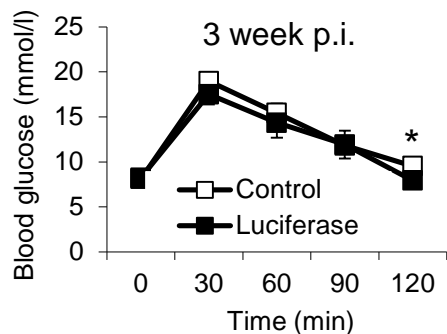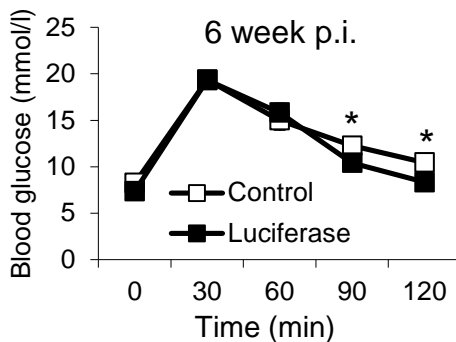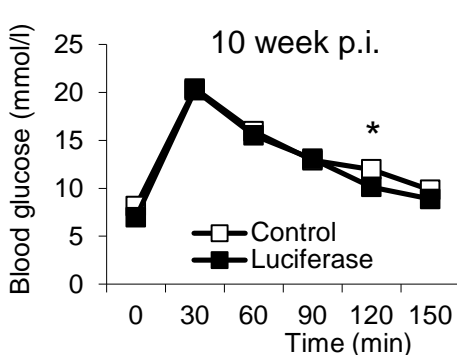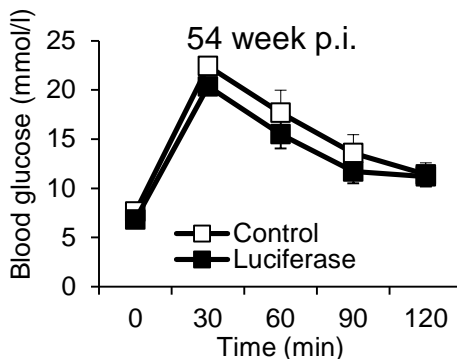

**ESM Fig 3. Blood glucose dynamics from mice with immunological disrupted islets. A.** Fasting blood glucose levels from mice transduced with AAV8-mIP2-Ovalbumin ( $n=5/\text{group}$ ). Note lower than normal fasting blood glucose levels in the vector-treated mice at 7 to 11 weeks p.i. Glucose tolerance test performed at 10-weeks post-infection showed faster blood glucose clearance in mice treated with the Ova-expressing AAV8 vector ( $n=5/\text{group}$ , right panel). **B.** Average body weight of mice treated with the AAV8-mIP2-Luc vector over the course of 54-weeks post-infection. **C.** Glucose tolerance tests conducted at 3-, 6-, 10-, & 54-weeks post-infection with the AAV8-mIP2-Luc vector ( $n=4/\text{group}$ ). **D.** Circulating GLP-1 levels from mice at 3- & 6-weeks post-infection with the AAV8-mIP2-Luc vector. \* $p < 0.05$ , \*\* $p < 0.001$ , \*\*\* $p < 0.0001$ .
