# Supplementary material for: Beta cell regeneration after single-round immunological destruction in a mouse model
Source: PubMed Central journal article supplement (PMC4287683; doi:10.1007/s00125-014-3416-4), 2014-10-23
Supplement: 125_2014_3416_MOESM4_ESM.pdf [file 125_2014_3416_MOESM4_ESM.pdf]

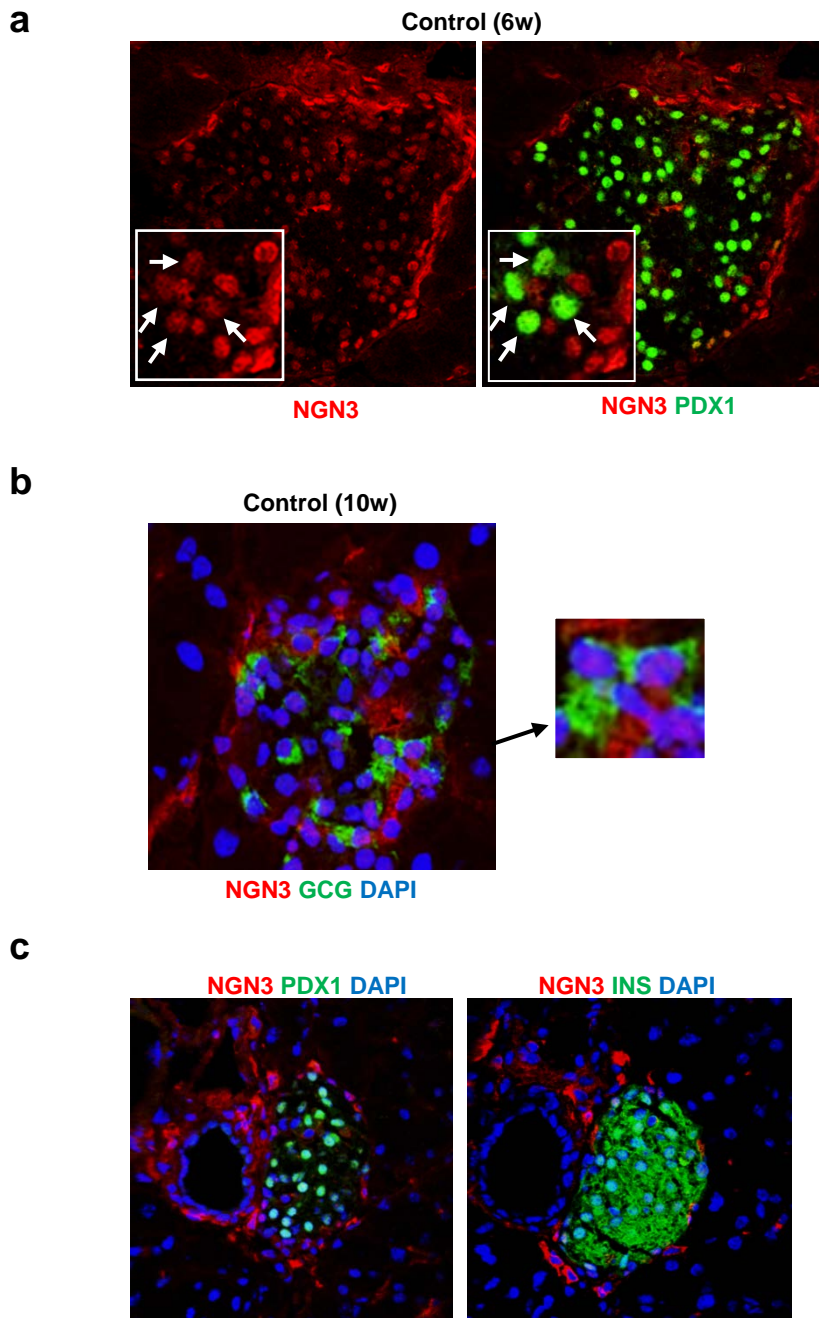

**ESM Fig 4. NGN3 expression in control mice at different ages. a.**

Immunohistochemistry of a control pancreatic islet showing NGN3 expression and localization relative to PDX-1. Modest nuclear-localized NGN3 signals were found in PDX1-positive beta-cells, while cytoplasmic NGN3 signals were evident in cells surrounding the islet. **b.** Control pancreatic islet showing NGN3 staining relative to GCG-positive cells. Some GCG-positive alpha cells showed nuclear NGN3 signals. **c.** Control islet showing NGN3, PDX-1, and Insulin staining. In a rare occasion when islets were found adjacent to pancreatic ducts, cells with strong cytoplasmic NGN3 signals were found around the ducts and the islets.
