# Supplementary material for: Beta cell regeneration after single-round immunological destruction in a mouse model
Source: PubMed Central journal article supplement (PMC4287683; doi:10.1007/s00125-014-3416-4), 2014-10-23
Supplement: 125_2014_3416_MOESM6_ESM.pdf [file 125_2014_3416_MOESM6_ESM.pdf]

+ AAV8-Luc (6 weeks)

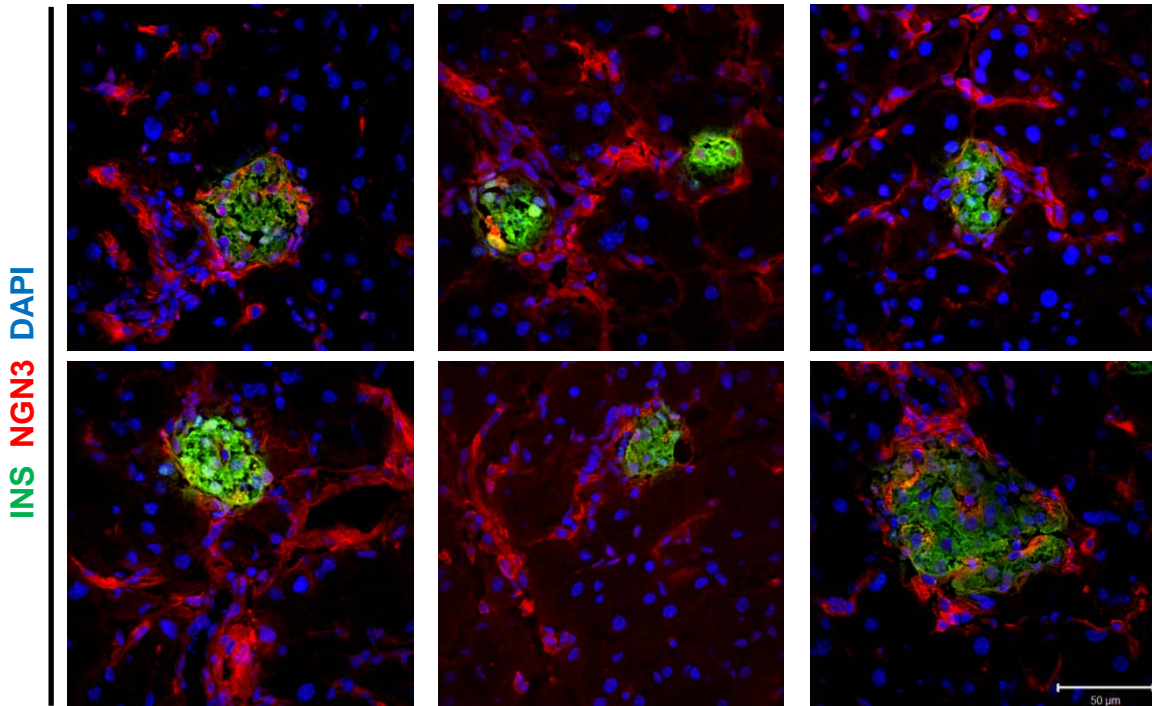

+ AAV8-Luc (10 weeks)

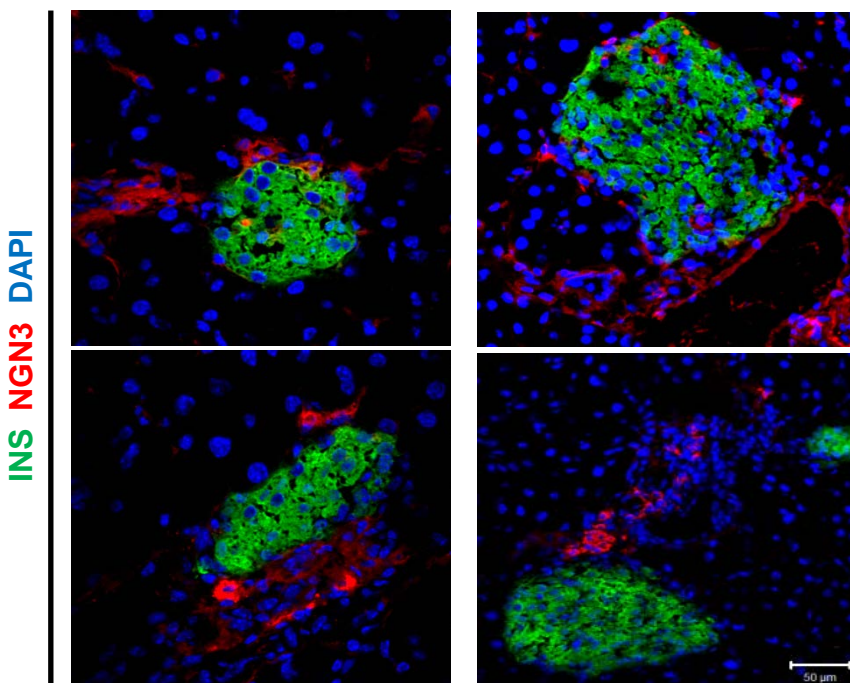

**ESM Fig 6. NGN3 expression in immunological disrupted islets at 6- & 10-weeks post-infection.** Representative islets from different mice at 6-weeks and 10-weeks post-infection. Both cytoplasmic and nuclear localizations of NGN3 were present in 6-week post-infected islets. By 10-week post-infection cytoplasmic NGN3 was predominant form. Images taken on 40x objective.
