# Supplementary material for: Beta cell regeneration after single-round immunological destruction in a mouse model
Source: PubMed Central journal article supplement (PMC4287683; doi:10.1007/s00125-014-3416-4), 2014-10-23
Supplement: 125_2014_3416_MOESM7_ESM.pdf [file 125_2014_3416_MOESM7_ESM.pdf]

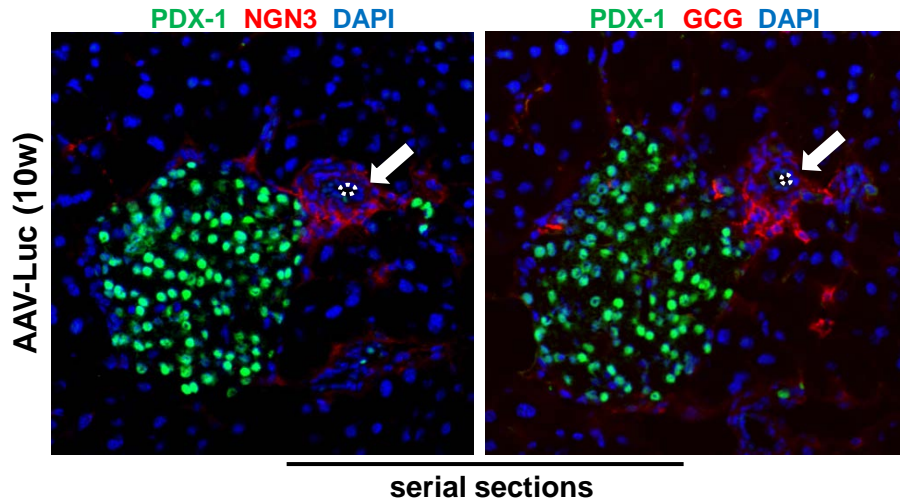

**ESM Fig 7. NGN3 and GCG expression in immunologically disrupted islets at 10-weeks post-infection.** Serially sectioned pancreatic islets at 10-weeks post-infection stained for PDX-1 (green), NGN3 (red, left panel) & GCG (red, right panel). Arrows indicate pancreatic duct.
