# Supplementary material for: Beta cell regeneration after single-round immunological destruction in a mouse model
Source: PubMed Central journal article supplement (PMC4287683; doi:10.1007/s00125-014-3416-4), 2014-10-23
Supplement: 125_2014_3416_MOESM8_ESM.pdf [file 125_2014_3416_MOESM8_ESM.pdf]

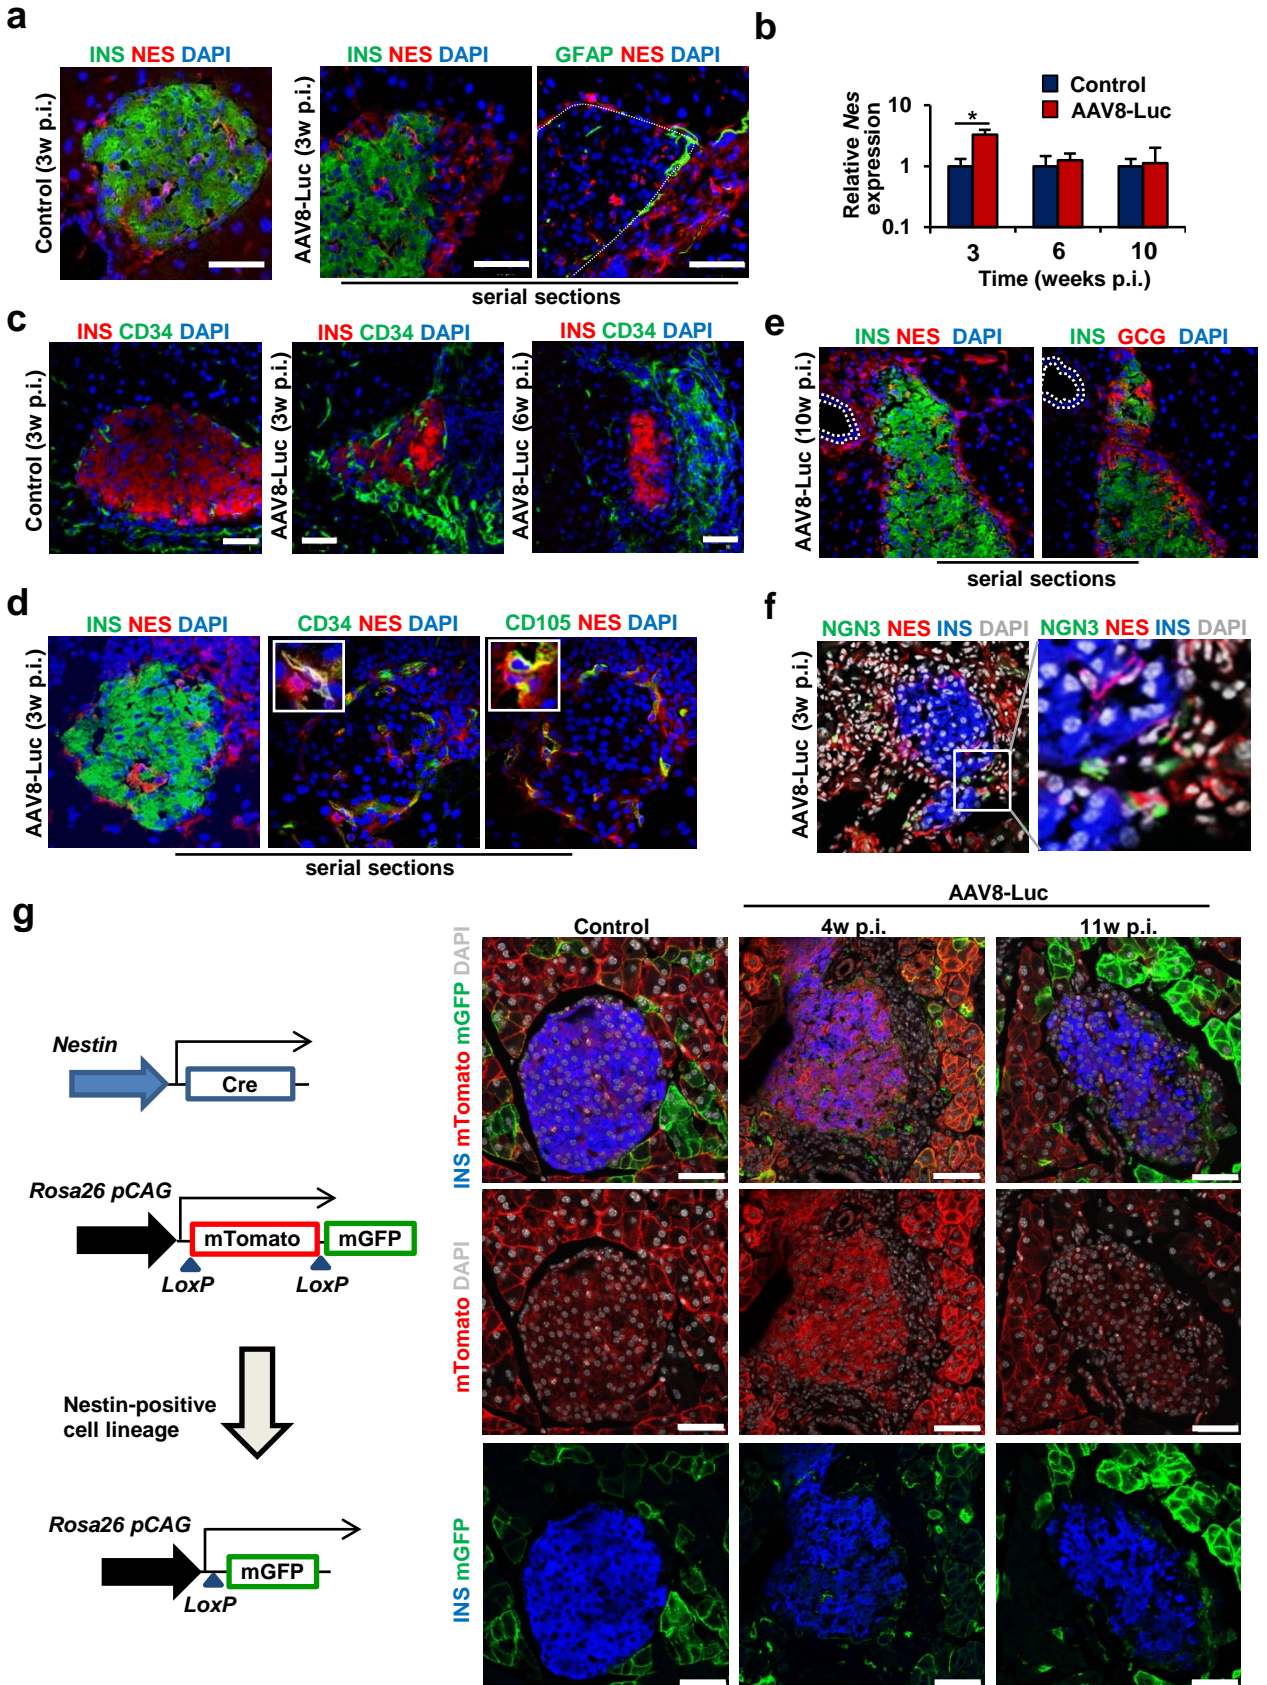

## ESM Fig. 8

**ESM Fig 8. Recruitment of NES- and CD34-positive vascular endothelial cells to damaged islets. a.** NES expression in the pancreas was detected by anti-NES antibody. **b.** qRT-PCR for *Nes* transcripts at 3-, 6-, and 10-wks p.i. (n=4 for each time point). \* $p < 0.05$ . **c.** CD34 expression was detected by anti-CD34 antibody. **d, e.** Serial sections of the pancreatic tissue were tested for expression of NES, CD34 and CD105, or NES and GCG. **f.** Costaining with NES and NGN3 antibodies. Note NGN3-positive cells were negative for NES signals (right panel). **g.** Schematic of our NES<sup>Cre</sup> ROSA<sup>mTmG</sup> lineage tracing mouse model. Cells with active nestin promoter generate Cre resulting in recombination of LoxP sites to activate mGFP expression. Confocal imaging showing control (left column), AAV8-Luc 4wk p.i. (middle) and AAV8-Luc 11wk p.i. (right column). **A, C and G;** Scale bars = 50  $\mu\text{m}$ .
