# Supplementary material for: Beta cell regeneration after single-round immunological destruction in a mouse model
Source: PubMed Central journal article supplement (PMC4287683; doi:10.1007/s00125-014-3416-4), 2014-10-23
Supplement: 125_2014_3416_MOESM9_ESM.pdf [file 125_2014_3416_MOESM9_ESM.pdf]

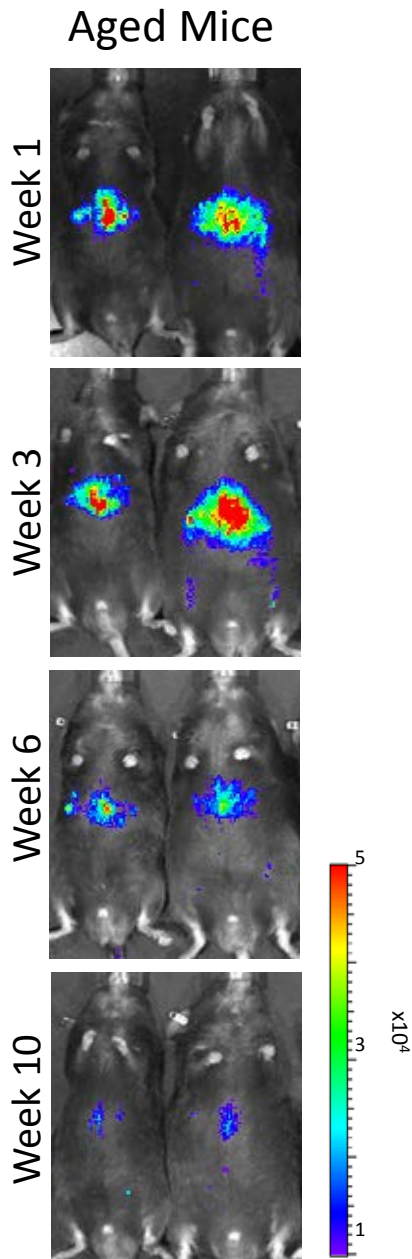

**ESM Fig 9. In vivo luciferase expression in aged mice infected with the AAV8-mIP2-Luciferase vector.** IVIS Xenogen imaging of same mice at 1-, 3-, 6-, 10-weeks post-infection with AAV8-mIP2-Luciferase vector is shown.
