# Supplementary material for: Beta cell regeneration after single-round immunological destruction in a mouse model
Source: PubMed Central journal article supplement (PMC4287683; doi:10.1007/s00125-014-3416-4), 2014-10-23
Supplement: 125_2014_3416_MOESM11_ESM.pdf [file 125_2014_3416_MOESM11_ESM.pdf]

AAV8-Luc (6w p.i.)

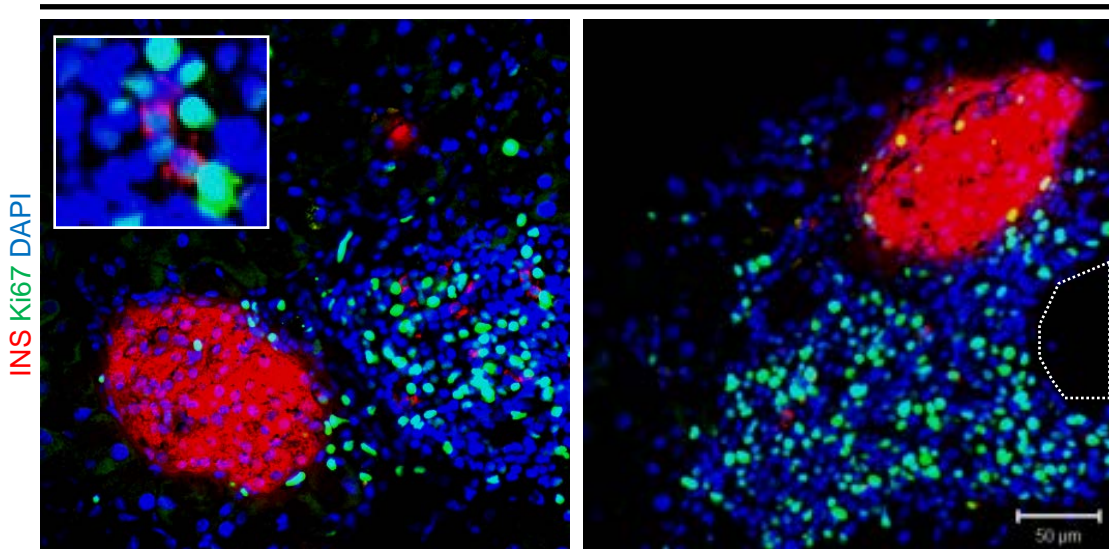

**ESM Fig. 11. Immunological islet damage in aged mice show mass of proliferating cells near islets with individualized insulin-positive cells.** Two representative islets from different aged AAV8-mIP2-Luc mice showing a rare occurrence of small insulin-positive cells (Red) within a mass of highly proliferative Ki67-positive (green) cells. Nuclei stained with DAPI (blue). Scale bars, 50  $\mu$ m.
